# Supplementary material for: Dose-dependent changes in global brain activity and functional connectivity following exposure to psilocybin: a BOLD MRI study in awake rats
Source: Front Neurosci. 2025 May 1;19:1554049. doi: 10.3389/fnins.2025.1554049 (PMC12078138; doi:10.3389/fnins.2025.1554049)
Supplement: Supplementary file 2 [file Table_2.xlsx]

## Sheet: Psilocybin Dose Response 
Non-parametric Kruskal-Wallis Test: Lower P value(0.05)indicates higher significance
Positively Activated Voxels
Region of Interest(ROI)	anterior lobe pituitary	cortical amygdaloid nucleus	CA1 hippocampus ventral	ventral subiculum	medial pretectal area	parafascicular thalamic nucleus	pontine nuclei	primary somatosensory ctx barrel field	primary motor ctx	parietal ctx	medial orbital ctx	dorsal lateral striatum	secondary motor ctx	anterior olfactory nucleus	retrosplenial rostral ctx	anterior thalamic nuclei	neural lobe pituitary	retrochiasmatic nucleus	visual 1 ctx	DPGi	ventral medial striatum	anterior cingulate area	basal amygdaloid nucleus	primary somatosensory ctx forelimb	ventral anterior thalamic nucleus	globus pallidus	primary somatosensory ctx hindlimb	accumbens core	parabrachial nucleus	2nd cerebellar lobule	bed nucleus stria terminalis	frontal association ctx	primary somatosensory ctx shoulder	ventral lateral striatum	dorsal medial striatum	primary somatosensory ctx trunk	granular cell layer	raphe linear	reticulotegmental nucleus	anterior pretectal nucleus	visual 2 ctx	entorhinal ctx	lateral amygdaloid nucleus	glomerular layer	claustrum	perirhinal ctx	medial dorsal thalamic nucleus	1st cerebellar lobule	temporal ctx
ROI-ID	19	35	26	170	90	98	106	130	79	116	88	42	80	20	126	14	92	119	156	46	165	31	24	131	158	58	132	16	96	3	145	55	134	162	44	135	59	121	129	21	157	52	68	57	33	114	82	2	150
Veh mean	24	12	20	19	0	8	23	44	76	13	12	13	49	27	10	10	4	1	44	6	9	36	22	23	2	1	12	7	11	34	4	22	4	32	18	3	70	1	1	4	54	109	5	88	1	20	7	7	9
Veh Std Error	4.99932	3.5051	9.19849	5.03998	0.202031	3.33095	6.62915	13.3745	13.6205	5.70177	1.60145	7.89945	10.2943	7.07011	3.51672	3.77784	0.993174	0.719032	13.1175	2.57275	4.39619	12.4794	8.43865	7.40794	1.17514	0.714286	5.93216	5.4003	5.33057	16.4095	2.14603	3.52831	1.95006	15.7102	8.85292	0.922139	18.5875	0.993174	1	1.14879	16.9563	24.0829	2.38761	10.5511	0.719032	7.95438	2.25123	2.87849	4.3737
Veh median	17	15	3	17	0	3	28	29	92	7	13	2	63	23	7	10	3	1	30	5	0	22	21	22	0	0	7	0	4	20	0	21	2	3	0	2	55	0	0	4	44	110	0	84	0	14	5	4	5
Veh maximum	46	24	60	46	1	20	51	98	104	43	18	49	77	56	25	23	9	5	91	18	26	89	54	48	7	5	46	39	40	129	15	34	15	106	52	7	151	7	7	9	112	203	15	127	4	54	17	15	30
Veh minimum	9	1	0	5	0	0	3	12	2	0	5	0	10	10	0	0	1	0	9	0	0	5	0	0	0	0	0	0	0	0	0	6	0	0	0	0	25	0	0	0	0	27	0	48	0	0	2	0	0
Low mean	9	11	8	14	0	6	17	59	62	13	3	42	39	24	16	10	1	0	40	1	20	41	14	29	2	5	17	11	3	12	7	11	3	68	37	2	75	1	1	4	41	96	3	48	4	20	4	3	7
Low Std Error	5.68475	2.2582	2.24006	2.69542	0	3.02877	6.04321	33.2089	20.361	7.67167	1.38136	25.0485	9.78754	8.38609	6.22618	3.97922	0.775913	0	19.9821	0.524891	8.90067	16.8632	5.38611	13.1769	1.44279	2.02031	7.86736	6.50882	1.81757	7.06168	3.07682	4.0805	1.88374	31.4305	16.7673	1.60277	22.592	0.935414	0.801784	2.37976	22.4345	21.3827	1.63429	16.4825	2.65297	6.81759	1.92659	1.85164	3.91752
Low median	3.5	11	6	14	0	2.5	10.5	22.5	44.5	1	2.5	12	35.5	22	9	8	0.5	0	21	0	9.5	32	13.5	11	0	3	5.5	2.5	1	3	3.5	8	1	57.5	33.5	0.5	103.5	0	0	1	13	83.5	1	42.5	0.5	18.5	2	0	3.5
Low maximum	45	20	17	24	0	22	38	263	159	55	10	193	84	62	40	31	6	0	157	3	63	139	45	99	11	14	53	45	13	54	22	33	14	251	135	12	133	7	6	17	170	203	12	123	20	54	14	13	31
Low minimum	0	0	1	3	0	0	0	1	2	0	0	0	0	0	0	0	0	0	1	0	0	0	0	2	0	0	0	0	0	0	0	0	0	0	0	0	0	0	0	0	2	40	0	0	0	3	0	0	0
Med mean	42	18	8	20	0	11	42	22	116	5	8	23	62	32	17	16	6	2	28	5	9	44	23	20	4	2	16	3	12	33	5	13	4	23	14	3	80	1	1	8	25	100	2	92	2	17	8	1	4
Med Std Error	7.1342	4.3507	3.73582	2.02171	0	3.76439	7.0469	9.32504	30.252	3.87298	2.29993	12.6163	15.2613	9.37406	8.60855	4.65389	1.35547	0.600925	10.7379	2.41276	4.61794	16.6281	9.20878	7.86493	1.78397	1.6048	6.78496	2.39129	4.53163	13.4117	1.89925	3.48466	1.98206	16.3125	7.30242	1.66905	20.2888	0.503953	0.491999	2.82843	8.18632	15.9226	1.06905	23.1828	1.33333	5.17549	2.3763	0.881917	2.15565
Med median	45	13	2	19	0	8	40	10	90	2	7	0	58	25	7	17	7	2	20	1	1	23	12	11	3	0	9	0	9	20	3	16	2	1	4	1	62	0	0	5	19	114	1	80	0	20	8	0	1
Med maximum	62	42	23	31	0	26	74	64	280	32	20	74	147	67	67	34	10	4	93	18	31	126	70	63	12	12	57	16	33	94	13	27	16	110	47	12	170	4	3	19	60	149	8	202	8	42	19	7	16
Med minimum	3	6	0	14	0	0	14	0	23	0	1	0	9	0	0	0	0	0	0	0	0	0	1	1	0	0	1	0	0	0	0	1	0	0	0	0	13	0	0	0	3	33	0	13	0	1	0	0	0
High mean	29	29	39	32	0	25	52	99	170	35	7	90	95	60	42	26	4	2	86	8	38	112	47	59	6	7	38	23	18	52	18	22	9	89	54	8	136	3	3	12	80	166	8	109	5	39	12	4	18
High Std Error	6.37922	3.92994	7.85231	4.2389	0	4.93328	10.9666	22.1761	25.3109	8.05438	2.12786	25.9499	14.6006	7.44743	7.47562	3.56793	1.27398	0.597614	19.9687	1.98906	10.1661	22.7913	8.82052	13.0261	1.44475	3.37592	7.12919	9.56556	5.15475	16.2475	5.696	4.23421	1.81375	24.2652	12.8421	2.41851	17.7437	1.71247	1.17176	2.67558	19.1589	28.1034	2.86883	19.1958	1.54046	8.93117	2.32823	1.85913	5.5617
High median	25	27	37	31	0	22	42	92	182	37	4	73	105	58	46	24	4	2	104	8	25	120	38	56	5	3	39	14	15	33	12	18	10	87	45	6	126	2	2	14	82	155	7	109	6	43	11	2	15
High maximum	56	50	77	52	0	46	97	206	258	59	14	215	139	90	65	43	9	5	183	15	87	195	92	122	13	25	61	76	42	134	41	45	17	190	132	20	208	14	7	22	168	341	25	165	13	68	20	12	44
High minimum	8	16	10	14	0	6	12	23	29	3	1	12	11	38	3	16	0	0	25	0	8	3	25	5	1	0	3	0	1	13	3	11	0	9	26	0	64	0	0	0	19	93	1	36	0	3	0	0	0
P value	0.00425	0.0046	0.00593	0.00656	0.00779	0.00955	0.01093	0.01158	0.01322	0.01588	0.01672	0.02013	0.02032	0.02236	0.02362	0.02379	0.02468	0.02653	0.0285	0.03287	0.03733	0.03959	0.03978	0.04507	0.04952	0.05255	0.05785	0.05913	0.05955	0.06125	0.06227	0.06248	0.06389	0.06923	0.07203	0.07482	0.08027	0.08271	0.08697	0.09869	0.09952	0.103	0.10568	0.10872	0.10977	0.11017	0.12223	0.1242	0.12549
Omega Square	0.34423	0.33854	0.31992	0.31246	0.06297	0.28486	0.27496	0.02728	0.26092	0.24737	0.24354	0.02707	0.22911	0.00055	0.21791	0.03525	0.21466	0.20926	0.20393	0.19329	0.0499	0.0253	0.01049	0.01602	0.07301	0.03701	0.07105	0.03748	0.14861	0.04936	0.07363	0.14497	0.05314	0.13719	0.13418	0.05744	0.01003	0.12363	0.02004	0.00526	0.10946	0.10682	0.04728	0.10265	0.03941	0.10163	0.00212	0.09236	0.09156
Negatively Activated Voxels
Region of Interest(ROI)	anterior lobe pituitary	anterior amygdaloid nucleus	temporal ctx	CA1 hippocampus ventral	neural lobe pituitary	perirhinal ctx	medial orbital ctx	entorhinal ctx	cortical amygdaloid nucleus	locus ceruleus	1st cerebellar lobule	ventral subiculum	secondary motor ctx	parietal ctx	trapezoid body	frontal association ctx	habenula nucleus	ectorhinal ctx	posterior hypothalamic area	CA2	glomerular layer	premammillary nucleus	medial cerebellar nucleus fastigial	retrochiasmatic nucleus	CA1 dorsal	insular ctx	visual 2 ctx	medial pretectal area	lemniscal nucleus	visual 1 ctx	retrosplenial rostral ctx	lateral posterior thalamic nucleus	caudal piriform ctx	periaqueductal gray thalamus	endopiriform nucleus	parabrachial nucleus	raphe linear	dorsomedial tegmental area	dentate gyrus dorsal	ventral lateral striatum	prerubral field	parafascicular thalamic nucleus	dorsal medial striatum	dorsal raphe	anterior pretectal nucleus	external plexiform layer	pontine reticular nucleus caudal	medial dorsal thalamic nucleus	interposed nucleus
ROI-ID	19	15	150	26	92	114	88	52	35	70	2	170	80	116	154	55	60	50	100	27	57	104	84	119	25	64	157	90	74	156	126	76	102	95	51	96	121	45	40	162	111	98	44	47	21	53	107	82	65
Veh mean	18	1	25	27	1	48	2	141	13	0	3	21	39	13	6	12	3	11	4	1	42	1	2	1	45	102	48	0	10	47	25	7	56	34	14	12	3	6	24	71	3	12	47	1	4	33	32	4	6
Veh Std Error	4.14532	0.297381	7.40472	7.61399	0.993174	9.1922	1.54963	24.8947	5.38011	0.184428	1.98635	6.0068	10.5411	6.00737	2.98294	3.44243	2.0784	3.59043	2.45919	0.723747	9.13616	0.57735	1.5253	0.690066	25.8408	30.8466	25.8999	0.142857	3.77244	24.6465	7.24968	4.7251	15.7508	12.0492	5.50942	4.8396	1.90774	2.44393	15.0787	30.8553	1.37766	5.27283	18.3781	0.857143	1.72812	6.63479	14.6136	1.78238	3.22828
Veh median	16	0	31	25	0	52	0	125	8	0	0	21	33	10	7	11	0	13	0	0	45	0	0	0	10	67	10	0	11	20	28	1	56	19	9	10	0	4	4	32	0	10	25	0	3	38	18	1	1
Veh maximum	40	2	53	64	7	84	11	254	37	1	14	40	95	43	22	28	15	22	14	5	78	4	11	5	183	212	177	1	25	174	51	31	136	72	40	29	11	16	110	204	9	32	125	6	12	49	100	12	23
Veh minimum	5	0	0	0	0	8	0	41	0	0	0	0	11	0	0	0	0	1	0	0	7	0	0	0	0	0	0	0	0	0	0	0	0	0	0	0	0	0	0	0	0	0	0	0	0	4	0	0	0
Low mean	35	0	31	36	4	59	11	168	24	1	4	30	80	31	5	19	10	16	11	2	86	1	3	0	54	154	77	0	15	69	37	26	82	59	20	19	4	10	35	84	2	24	49	3	8	48	41	8	5
Low Std Error	5.97187	0	7.49149	9.48038	1.29264	12.7567	3.40318	29.9106	3.70018	0.346263	1.77209	7.09987	19.0948	12.4596	2.05039	3.94574	3.27288	3.55389	4.4075	0.668153	21.0746	0.285714	1.25763	0	21.0558	44.1789	23.9069	0	4.23662	23.2307	9.86115	8.94185	12.4235	13.3703	8.68599	5.93653	1.95615	4.51274	15.2422	34.1063	1.38136	8.841	17.7025	1.07736	3.54526	12.573	17.7821	2.6707	2.30295
Low median	38	0	31.5	25.5	3.5	58.5	15	169	27.5	0	2	23	76.5	17	3.5	16.5	9.5	15.5	6.5	1	86	0	2.5	0	45	158	73.5	0	15.5	52.5	37	26	76	57	9	14.5	1	4.5	19.5	56.5	0	18	38.5	3	5	52	28	8	3.5
Low maximum	57	0	59	80	10	112	24	261	36	2	13	61	156	91	13	35	23	28	29	4	178	2	8	0	150	306	184	0	36	179	75	56	131	106	56	41	14	29	108	219	10	62	113	6	26	94	125	18	16
Low minimum	5	0	2	1	0	15	0	72	10	0	0	7	16	0	0	5	0	5	0	0	15	0	0	0	0	18	6	0	1	2	1	0	44	21	0	2	0	0	0	0	0	0	0	0	0	9	0	0	0
Med mean	5	0	36	33	0	60	4	165	20	1	10	27	53	28	11	17	5	17	15	3	49	0	6	1	89	184	93	0	7	91	25	10	84	55	24	13	5	9	45	124	4	17	79	2	3	30	61	5	10
Med Std Error	3.1021	0	6.10848	8.63019	0.125988	9.70232	1.79063	31.9771	4.32784	0.267261	2.45758	5.47541	19.0141	9.32929	3.48694	6.33302	2.83333	4.25572	4.38793	0.99003	12.7477	0.125988	1.89925	0.383178	20.9342	37.2261	31.3014	0	2.04415	27.3054	9.34841	4.20364	16.776	10.6466	7.41004	4.44588	1.37292	4.18377	13.1339	34.5259	1.2646	6.37362	15.2004	0.963624	2.70214	9.53565	20.77	1.81703	3.06478
Med median	2	0	34	25	0	57	2	172	23	1	9	31	53	23	15	14	2	15	13	3	59	0	8	0	80	202	89	0	7	100	23	8	76	64	23	12	6	1	43	90	4	12	98	0	0	23	52	4	10
Med maximum	25	0	55	67	1	104	14	266	36	2	18	49	156	80	28	53	19	34	33	8	89	1	14	3	177	361	231	0	16	205	74	28	167	85	65	29	9	29	100	264	10	42	121	6	22	68	139	13	24
Med minimum	0	0	4	0	0	26	0	13	0	0	0	0	1	1	0	0	0	0	0	0	2	0	0	0	0	54	0	0	0	0	0	0	16	0	1	0	0	0	1	2	0	0	0	0	0	0	0	0	0
High mean	12	0	11	7	1	28	3	78	9	0	5	12	29	11	3	8	6	8	9	1	42	1	5	0	53	109	34	0	9	39	14	13	64	42	10	9	2	3	43	60	3	9	56	1	3	30	23	3	7
High Std Error	5.79443	0	4.89331	3.61435	0.796819	7.0483	1.57485	19.1143	3.23486	0	1.58615	4.48056	12.4097	5.85574	1.98306	2.73861	1.85164	2.66667	3.89597	0.758549	14.7551	0.5	1.17683	0.188982	14.5872	28.3776	12.5643	0	3.30284	13.8293	6.67648	5.64105	13.6945	11.3323	4.6102	4.37571	0.866025	1.5698	13.9767	16.8047	1.16155	4.5687	13.7581	0.62042	2.39792	8.01363	9.74517	1.50528	1.60851
High median	11	0	3	5	0	28	1	87	7	0	4	9	9	3	0	7	4	10	3	1	27	1	6	0	41	104	20	0	12	32	4	9	73	39	7	4	0	0	34	68	3	3	54	0	0	42	21	2	7
High maximum	46	0	34	31	6	52	12	155	20	0	11	33	99	41	14	20	13	21	25	6	105	4	9	1	121	209	82	0	26	95	45	33	109	86	37	31	5	11	117	136	7	33	112	5	19	54	73	10	14
High minimum	0	0	0	0	0	0	0	8	0	0	0	0	0	0	0	0	0	0	0	0	3	0	0	0	0	0	0	0	0	0	0	0	6	2	0	0	0	0	0	0	0	0	1	0	0	0	0	0	0
P value	0.00308	0.00787	0.02406	0.02605	0.035	0.04267	0.04775	0.05955	0.0617	0.09181	0.09532	0.1151	0.12977	0.13192	0.15398	0.17573	0.19659	0.19876	0.21006	0.22927	0.23132	0.23654	0.23699	0.24752	0.26899	0.27725	0.28284	0.29401	0.2966	0.30773	0.30998	0.33704	0.34922	0.35475	0.36786	0.36823	0.37591	0.39266	0.39784	0.39987	0.40605	0.41436	0.4188	0.42082	0.42146	0.42376	0.42499	0.43379	0.43385
Omega Square	0.36446	0.33461	0.20724	0.22145	0.1665	0.16663	0.1686	0.14452	0.1646	0.17475	0.13159	0.11887	0.10238	0.10344	0.05858	0.07267	0.05056	0.05771	0.04656	0.06024	0.04903	0.01108	0.05517	0.0243	0.03137	0.03165	0.03473	-0.06297	0.0256	0.03725	0.03808	0.00469	0.00236	0.00734	0.01717	0.01844	0.0263	0.0057	-0.00559	0.01273	0.03095	0.02164	0.00783	-0.02041	-0.00526	0.00047	-0.01019	-0.00212	0.00493
[truncated: 120 more columns]

## Sheet: Tables
	Positive Volume of Activation												Negative Volume of Activation
		Vehicle		0.03 mg		0.3 mg		3.0 mg						Vehicle		0.03 mg		0.3 mg		3.0 mg
	Brain Area	Mean	SE	Mean	SE	Mean	SE	Mean	SE	P val	ω Sq		Brain Area	Mean	SE	Mean	SE	Mean	SE	Mean	SE	P val	ω Sq
	anterior lobe pituitary	24	4.99932	9	5.68475	42	7.1342	29	6.37922	0.00425	0.34423		anterior lobe pituitary	18	4.14532	35	5.97187	5	3.1021	12	5.79443	0.00308	0.36446
	cortical amygdaloid nucleus	12	3.5051	11	2.2582	18	4.3507	29	3.92994	0.0046	0.33854		anterior amygdaloid nucleus	1	0.297381	0	0	0	0	0	0	0.00787	0.33461
	CA1 hippocampus ventral	20	9.19849	8	2.24006	8	3.73582	39	7.85231	0.00593	0.31992		temporal ctx	25	7.40472	31	7.49149	36	6.10848	11	4.89331	0.02406	0.20724
	ventral subiculum	19	5.03998	14	2.69542	20	2.02171	32	4.2389	0.00656	0.31246		CA1 hippocampus ventral	27	7.61399	36	9.48038	33	8.63019	7	3.61435	0.02605	0.22145
	medial pretectal area	0	0.202031	0	0	0	0	0	0	0.00779	0.06297		neural lobe pituitary	1	0.993174	4	1.29264	0	0.125988	1	0.796819	0.035	0.1665
	parafascicular thalamic nucleus	8	3.33095	6	3.02877	11	3.76439	25	4.93328	0.00955	0.28486		perirhinal ctx	48	9.1922	59	12.7567	60	9.70232	28	7.0483	0.04267	0.16663
	pontine nuclei	23	6.62915	17	6.04321	42	7.0469	52	10.9666	0.01093	0.27496		medial orbital ctx	2	1.54963	11	3.40318	4	1.79063	3	1.57485	0.04775	0.1686
	primary somatosensory ctx barrel field	44	13.3745	59	33.2089	22	9.32504	99	22.1761	0.01158	0.02728		entorhinal ctx	141	24.8947	168	29.9106	165	31.9771	78	19.1143	0.05955	0.14452
	primary motor ctx	76	13.6205	62	20.361	116	30.252	170	25.3109	0.01322	0.26092		cortical amygdaloid nucleus	13	5.38011	24	3.70018	20	4.32784	9	3.23486	0.0617	0.1646
	parietal ctx	13	5.70177	13	7.67167	5	3.87298	35	8.05438	0.01588	0.24737		locus ceruleus	0	0.184428	1	0.346263	1	0.267261	0	0	0.09181	0.17475
	medial orbital ctx	12	1.60145	3	1.38136	8	2.29993	7	2.12786	0.01672	0.24354		1st cerebellar lobule	3	1.98635	4	1.77209	10	2.45758	5	1.58615	0.09532	0.13159
	dorsal lateral striatum	13	7.89945	42	25.0485	23	12.6163	90	25.9499	0.02013	0.02707		ventral subiculum	21	6.0068	30	7.09987	27	5.47541	12	4.48056	0.1151	0.11887
	secondary motor ctx	49	10.2943	39	9.78754	62	15.2613	95	14.6006	0.02032	0.22911		secondary motor ctx	39	10.5411	80	19.0948	53	19.0141	29	12.4097	0.12977	0.10238
	anterior olfactory nucleus	27	7.07011	24	8.38609	32	9.37406	60	7.44743	0.02236	0.00055		parietal ctx	13	6.00737	31	12.4596	28	9.32929	11	5.85574	0.13192	0.10344
	retrosplenial rostral ctx	10	3.51672	16	6.22618	17	8.60855	42	7.47562	0.02362	0.21791		trapezoid body	6	2.98294	5	2.05039	11	3.48694	3	1.98306	0.15398	0.05858
	anterior thalamic nuclei	10	3.77784	10	3.97922	16	4.65389	26	3.56793	0.02379	0.03525		frontal association ctx	12	3.44243	19	3.94574	17	6.33302	8	2.73861	0.17573	0.07267
	neural lobe pituitary	4	0.993174	1	0.775913	6	1.35547	4	1.27398	0.02468	0.21466		habenula nucleus	3	2.0784	10	3.27288	5	2.83333	6	1.85164	0.19659	0.05056
	retrochiasmatic nucleus	1	0.719032	0	0	2	0.600925	2	0.597614	0.02653	0.20926		ectorhinal ctx	11	3.59043	16	3.55389	17	4.25572	8	2.66667	0.19876	0.05771
	visual 1 ctx	44	13.1175	40	19.9821	28	10.7379	86	19.9687	0.0285	0.20393		posterior hypothalamic area	4	2.45919	11	4.4075	15	4.38793	9	3.89597	0.21006	0.04656
	DPGi	6	2.57275	1	0.524891	5	2.41276	8	1.98906	0.03287	0.19329		CA2	1	0.723747	2	0.668153	3	0.99003	1	0.758549	0.22927	0.06024
	ventral medial striatum	9	4.39619	20	8.90067	9	4.61794	38	10.1661	0.03733	0.0499		glomerular layer	42	9.13616	86	21.0746	49	12.7477	42	14.7551	0.23132	0.04903
	anterior cingulate area	36	12.4794	41	16.8632	44	16.6281	112	22.7913	0.03959	0.0253		premammillary nucleus	1	0.57735	1	0.285714	0	0.125988	1	0.5	0.23654	0.01108
	basal amygdaloid nucleus	22	8.43865	14	5.38611	23	9.20878	47	8.82052	0.03978	0.01049		medial cerebellar nucleus fastigial	2	1.5253	3	1.25763	6	1.89925	5	1.17683	0.23699	0.05517
	primary somatosensory ctx forelimb	23	7.40794	29	13.1769	20	7.86493	59	13.0261	0.04507	0.01602		retrochiasmatic nucleus	1	0.690066	0	0	1	0.383178	0	0.188982	0.24752	0.0243
	ventral anterior thalamic nucleus	2	1.17514	2	1.44279	4	1.78397	6	1.44475	0.04952	0.07301		CA1 dorsal	45	25.8408	54	21.0558	89	20.9342	53	14.5872	0.26899	0.03137
	globus pallidus	1	0.714286	5	2.02031	2	1.6048	7	3.37592	0.05255	0.03701		insular ctx	102	30.8466	154	44.1789	184	37.2261	109	28.3776	0.27725	0.03165
	primary somatosensory ctx hindlimb	12	5.93216	17	7.86736	16	6.78496	38	7.12919	0.05785	0.07105		visual 2 ctx	48	25.8999	77	23.9069	93	31.3014	34	12.5643	0.28284	0.03473
	accumbens core	7	5.4003	11	6.50882	3	2.39129	23	9.56556	0.05913	0.03748		medial pretectal area	0	0.142857	0	0	0	0	0	0	0.29401	-0.06297
	parabrachial nucleus	11	5.33057	3	1.81757	12	4.53163	18	5.15475	0.05955	0.14861		lemniscal nucleus	10	3.77244	15	4.23662	7	2.04415	9	3.30284	0.2966	0.0256
	2nd cerebellar lobule	34	16.4095	12	7.06168	33	13.4117	52	16.2475	0.06125	0.04936		visual 1 ctx	47	24.6465	69	23.2307	91	27.3054	39	13.8293	0.30773	0.03725
	bed nucleus stria terminalis	4	2.14603	7	3.07682	5	1.89925	18	5.696	0.06227	0.07363		retrosplenial rostral ctx	25	7.24968	37	9.86115	25	9.34841	14	6.67648	0.30998	0.03808
	frontal association ctx	22	3.52831	11	4.0805	13	3.48466	22	4.23421	0.06248	0.14497		lateral posterior thalamic nucleus	7	4.7251	26	8.94185	10	4.20364	13	5.64105	0.33704	0.00469
	primary somatosensory ctx shoulder	4	1.95006	3	1.88374	4	1.98206	9	1.81375	0.06389	0.05314		caudal piriform ctx	56	15.7508	82	12.4235	84	16.776	64	13.6945	0.34922	0.00236
	ventral lateral striatum	32	15.7102	68	31.4305	23	16.3125	89	24.2652	0.06923	0.13719		periaqueductal gray thalamus	34	12.0492	59	13.3703	55	10.6466	42	11.3323	0.35475	0.00734
	dorsal medial striatum	18	8.85292	37	16.7673	14	7.30242	54	12.8421	0.07203	0.13418		endopiriform nucleus	14	5.50942	20	8.68599	24	7.41004	10	4.6102	0.36786	0.01717
	primary somatosensory ctx trunk	3	0.922139	2	1.60277	3	1.66905	8	2.41851	0.07482	0.05744		parabrachial nucleus	12	4.8396	19	5.93653	13	4.44588	9	4.37571	0.36823	0.01844
	granular cell layer	70	18.5875	75	22.592	80	20.2888	136	17.7437	0.08027	0.01003		raphe linear	3	1.90774	4	1.95615	5	1.37292	2	0.866025	0.37591	0.0263
	raphe linear	1	0.993174	1	0.935414	1	0.503953	3	1.71247	0.08271	0.12363		dorsomedial tegmental area	6	2.44393	10	4.51274	9	4.18377	3	1.5698	0.39266	0.0057
	reticulotegmental nucleus	1	1	1	0.801784	1	0.491999	3	1.17176	0.08697	0.02004		dentate gyrus dorsal	24	15.0787	35	15.2422	45	13.1339	43	13.9767	0.39784	-0.00559
	anterior pretectal nucleus	4	1.14879	4	2.37976	8	2.82843	12	2.67558	0.09869	0.00526		ventral lateral striatum	71	30.8553	84	34.1063	124	34.5259	60	16.8047	0.39987	0.01273
	visual 2 ctx	54	16.9563	41	22.4345	25	8.18632	80	19.1589	0.09952	0.10946		prerubral field	3	1.37766	2	1.38136	4	1.2646	3	1.16155	0.40605	0.03095
	entorhinal ctx	109	24.0829	96	21.3827	100	15.9226	166	28.1034	0.103	0.10682		parafascicular thalamic nucleus	12	5.27283	24	8.841	17	6.37362	9	4.5687	0.41436	0.02164
	lateral amygdaloid nucleus	5	2.38761	3	1.63429	2	1.06905	8	2.86883	0.10568	0.04728		dorsal medial striatum	47	18.3781	49	17.7025	79	15.2004	56	13.7581	0.4188	0.00783
	glomerular layer	88	10.5511	48	16.4825	92	23.1828	109	19.1958	0.10872	0.10265		dorsal raphe	1	0.857143	3	1.07736	2	0.963624	1	0.62042	0.42082	-0.02041
	claustrum	1	0.719032	4	2.65297	2	1.33333	5	1.54046	0.10977	0.03941		anterior pretectal nucleus	4	1.72812	8	3.54526	3	2.70214	3	2.39792	0.42146	-0.00526
	perirhinal ctx	20	7.95438	20	6.81759	17	5.17549	39	8.93117	0.11017	0.10163		external plexiform layer	33	6.63479	48	12.573	30	9.53565	30	8.01363	0.42376	0.00047
	medial dorsal thalamic nucleus	7	2.25123	4	1.92659	8	2.3763	12	2.32823	0.12223	0.00212		pontine reticular nucleus caudal	32	14.6136	41	17.7821	61	20.77	23	9.74517	0.42499	-0.01019
	1st cerebellar lobule	7	2.87849	3	1.85164	1	0.881917	4	1.85913	0.1242	0.09236		medial dorsal thalamic nucleus	4	1.78238	8	2.6707	5	1.81703	3	1.50528	0.43379	-0.00212
	temporal ctx	9	4.3737	7	3.91752	4	2.15565	18	5.5617	0.12549	0.09156		interposed nucleus	6	3.22828	5	2.30295	10	3.06478	7	1.60851	0.43385	0.00493
	ventral pallidum	15	3.64496	13	7.15552	5	2.5174	26	8.44332	0.12618	0.0081		substantia nigra reticularis	15	9.18776	19	6.81516	12	4.95496	19	5.23874	0.453	-0.01676
	lateral preoptic area	3	1.30671	5	2.96235	1	0.527046	6	2.21556	0.1342	0.06837		DPGi	5	2.86546	8	3.12291	8	3.27932	3	1.89402	0.45902	0.00667
	prelimbic ctx	22	9.52905	11	4.83925	16	6.29374	43	13.5661	0.13469	0.02288		supraoptic nucleus	0	0.297381	1	0.404061	0	0.125988	1	0.327327	0.46019	-0.05777
	ventrolateral thalamic nucleus	5	3.10036	7	3.38062	5	3.00066	12	3.22072	0.13842	0.07678		lateral dorsal thalamic nucleus	1	0.986301	3	1.38505	1	1.00791	1	0.629941	0.46678	-0.0361
	endopiriform nucleus	11	5.44171	11	8.27817	6	3.86734	20	7.23363	0.13986	0.08313		primary motor ctx	77	22.2472	133	40.0331	86	30.2599	63	23.4399	0.46737	0.01051
	motor trigeminal nucleus	4	2.50578	2	1.3248	4	1.65831	7	2.5174	0.14179	0.01681		medial amygdaloid nucleus	10	4.54307	17	5.47723	8	3.09056	12	4.32921	0.47364	-0.01997
	posterior thalamic nucleus	13	5.67307	9	5.19591	15	7.47084	36	10.2278	0.14287	0.0411		auditory ctx	81	34.5412	106	24.8539	100	25.7075	66	16.9706	0.47638	-0.01276
	White Matter	144	35.3861	172	59.7743	144	31.5067	289	67.6548	0.14728	0.05081		central gray	9	3.85361	13	5.07394	14	4.25105	8	2.76314	0.48387	-0.01041
	pontine reticular nucleus oral	13	9.09586	11	8.86851	17	6.13247	27	9.59683	0.15543	0.07124		vestibular nucleus	29	11.4485	53	17.0054	44	14.9305	32	10.6083	0.48399	-0.01793
	external plexiform layer	31	6.16331	29	9.51047	42	10.1048	55	8.48972	0.16353	0.07089		ventral pallidum	19	7.42857	24	10.9338	32	8.68588	17	6.83479	0.48475	-0.0081
	lemniscal nucleus	17	4.04061	9	3.36246	19	5.54563	15	3.08285	0.18349	0.06182		pontine nuclei	21	9.72339	29	7.07522	22	7.34469	16	6.06512	0.4974	0.00707
	ventral orbital ctx	8	4.36124	9	4.02416	6	3.43303	18	6.70229	0.18536	0.02574		zona incerta	15	8.23011	17	7.73212	27	7.39208	22	6.66667	0.49942	-0.0236
	insular ctx	113	23.9977	100	47.5998	72	15.765	144	33.9834	0.18888	0.05953		subthalamic nucleus	0	0.142857	1	0.202031	1	0.377964	0	0.199205	0.49944	0.02035
	central gray	16	5.43233	6	3.90676	7	3.11741	15	5.2114	0.20641	0.01041		anterior olfactory nucleus	46	9.37503	46	14.4755	46	10.1696	29	11.1384	0.51269	-0.00055
	lateral orbital ctx	22	7.33132	26	10.005	19	8.64535	40	9.63212	0.21574	0.0311		granular cell layer	77	17.488	126	38.7504	70	24.2186	62	20.8696	0.51566	-0.01003
	central medial thalamic nucleus	1	0.704698	2	0.808122	1	0.886405	4	1.53659	0.22836	0.05171		root of trigeminal nerve	23	8.57103	39	10.4154	40	10.1795	29	8.7014	0.51576	-0.02967
	CA3 dorsal	27	9.79657	29	11.8656	15	5.69182	37	7.09068	0.23725	0.03019		rostral piriform ctx	64	15.7668	70	25.2526	87	19.2215	51	17.0375	0.51704	-0.02614
	reuniens nucleus	4	2.94969	7	4.0051	2	0.731925	9	3.0355	0.23993	0.02679		lateral geniculate	6	3.69316	13	5.23309	10	3.2902	13	4.71699	0.52555	-0.03305
	3rd cerebellar lobule	26	13.8131	13	6.54654	30	13.8368	42	13.8887	0.24838	0.05228		pedunculopontine tegmental area	3	1.23443	2	0.83146	2	0.866025	1	0.766356	0.52574	-0.01683
	CA1 dorsal	52	16.1443	51	23.1038	19	6.65505	56	18.0941	0.25958	0.03406		ventral tegmental area	4	2.40464	5	1.97884	7	2.163	6	1.88982	0.53383	-0.02032
	central amygdaloid nucleus	13	5.10768	15	5.95369	6	3.4744	13	3.73901	0.25984	0.04155		dentate gyrus ventral	12	6.14839	23	7.39536	15	4.30577	15	4.98012	0.5427	-0.0259
	medial cerebellar nucleus fastigial	5	1.77089	3	1.58999	0	0.383178	3	1.32438	0.26669	0.03187		ventral posteriolmedial thalamic nucleus	12	5.5757	18	8.26213	23	5.70331	14	6.89202	0.5445	-0.02279
	CA2	1	0.534522	1	0.775913	0	0.125988	1	0.422577	0.27074	0.03064		cochlear nucleus	8	3.16013	10	3.39116	16	5.17127	11	3.28959	0.54603	-0.03233
	superior colliculus	63	12.1555	43	12.8531	75	17.3843	77	12.3974	0.27484	0.03435		basal amygdaloid nucleus	18	7.18748	33	11.4213	20	6.7215	16	6.72888	0.54726	-0.01049
	substantia nigra compacta	4	1.63299	2	1.05825	1	0.590937	3	1.37725	0.27682	0.01633		motor trigeminal nucleus	7	3.0034	9	3.45488	10	3.27206	5	2.64875	0.55495	-0.01681
	ventromedial thalamic nucleus	2	1.3875	4	3.28843	2	1.40295	10	4.4441	0.27979	0.03447		reuniens nucleus	9	4.9315	7	3.36814	13	4.27664	9	3.3859	0.55571	-0.02679
	auditory ctx	53	20.0569	47	20.363	30	11.761	79	21.403	0.28095	0.01276		prelimbic ctx	17	9.7698	49	16.4326	29	12.208	19	9.27512	0.55734	-0.02288
	primary somatosensory ctx jaw	34	6.93115	46	16.7938	39	13.0987	71	16.7077	0.28492	0.05048		facial nucleus	6	3.63187	10	2.89572	10	3.31543	6	2.35871	0.56144	-0.03735
	anterior amygdaloid nucleus	0	0.428571	0	0	0	0	0	0	0.29401	0.0239		Lat	3	1.44514	2	1.2413	4	1.41421	2	0.590937	0.56298	-0.0078
	habenula nucleus	18	3.65148	10	3.09542	15	2.83963	12	2.52212	0.30542	0.02077		ventral medial nucleus	4	2.43417	4	1.75473	6	2.46	8	2.848	0.56687	-0.03846
	accumbens shell	15	6.36102	17	10.4701	11	3.25381	31	10.9013	0.31237	0.04406		substantia nigra compacta	2	1.24813	3	1.01895	4	1.63785	5	1.47734	0.56857	-0.01633
	reticular nucleus	6	2.15394	12	3.91752	11	5.46417	15	3.27569	0.33736	0.08698		7th cerebellar lobule	9	5.03255	8	4.98876	13	5.4841	15	4.18093	0.5695	-0.00746
	ventral posteriolateral thalamic nucleus	4	1.81265	10	4.56249	6	3.10402	14	5.03953	0.34	0.07688		White Matter	33	14.4368	35	11.8507	52	14.3577	47	10.7207	0.57233	-0.03306
	posterior hypothalamic area	11	4.3417	7	3.43897	5	1.77057	12	3.22379	0.34468	0.01075		subiculum dorsal	17	9.48145	20	8.08564	28	7.4445	21	5.93349	0.57638	-0.03546
	ventral tegmental area	6	2.13809	5	2.59316	1	0.801784	4	1.476	0.35315	0.02032		reticulotegmental nucleus	1	0.594762	3	1.38413	2	0.971825	1	0.692935	0.57837	-0.02004
	ectorhinal ctx	5	2.54884	4	1.67515	4	2.09591	9	3.45894	0.36384	0.00622		primary somatosensory ctx forelimb	31	13.3478	52	20.43	45	14.1322	24	8.5063	0.58092	-0.01602
	triangular septal nucleus	2	0.81232	3	1.32095	2	0.82616	3	0.63932	0.36591	0.06996		raphe magnus	5	2.2872	4	1.94569	7	2.19668	3	1.32886	0.58248	-0.0439
	dentate gyrus ventral	26	7.89471	14	3.46852	17	4.08443	25	5.30498	0.36983	0.0259		ventral orbital ctx	15	5.23268	21	9.67851	22	5.52914	11	5.42518	0.5843	-0.02574
	inferior olivary complex	7	3.01921	13	3.81157	12	2.59808	15	4.08151	0.37688	0.06574		10th cerebellar lobule	12	6.24064	17	6.34308	18	5.61072	11	4.07957	0.58625	-0.03131
	supramammillary nucleus	4	1.68224	4	1.39971	2	1.08562	1	0.742689	0.38145	0.07238		lateral hypothalamus	48	24.8481	46	18.7606	67	16.539	62	18.5589	0.59098	-0.03695
	olfactory tubercles	53	9.03809	34	9.82798	45	8.90225	63	15.5357	0.38475	0.06802		retrosplenial caudal ctx	71	21.6563	102	22.6806	114	31.3003	88	19.6945	0.59252	-0.03793
	4th cerebellar lobule	18	8.92562	13	9.2183	28	13.905	35	14.7088	0.38783	0.07837		CA3 dorsal	19	8.78775	35	12.8456	34	9.58256	26	7.4437	0.59875	-0.03019
	infralimbic ctx	24	4.66497	12	5.10602	18	4.85177	21	6.79928	0.39106	0.04493		Ventricle	5	2.5112	10	3.14894	10	3.54618	8	2.88469	0.6048	-0.03806
	median raphe nucleus	2	1.81828	3	2.01462	3	1.86126	7	2.90798	0.39311	0.03753		lateral orbital ctx	30	10.0058	39	15.1078	38	8.47686	23	10.0293	0.60778	-0.0311
	interpeduncular nucleus	4	1.98806	4	1.80631	7	2.69111	8	2.07689	0.40455	0.09154		medial geniculate	7	4.18533	13	3.71291	16	5.29413	13	3.59066	0.61178	-0.04045
	periaqueductal gray thalamus	44	15.2592	35	10.2049	38	9.74313	55	10.1015	0.40486	0.00283		precuniform nucleus	1	0.459221	0	0.267261	1	0.726483	1	0.750661	0.6129	-0.02713
	Lat	2	1.05624	2	1.19095	1	1.00791	1	1.11803	0.40706	0.0078		superior colliculus	52	15.7078	83	22.8848	61	17.4425	49	16.0134	0.62049	-0.03435
	7th cerebellar lobule	5	2.56746	3	3.60803	3	2.34521	5	3.96863	0.40854	0.00746		anterior hypothalamic area	6	3.05505	6	4.35656	7	2.81648	8	2.87849	0.63025	-0.05434
	10th cerebellar lobule	15	6.87893	8	5.74789	7	3.16667	16	6.04284	0.41549	0.03131		paraventricular nuclus	1	0.857143	1	0.349927	2	1.11448	2	0.82616	0.63672	-0.0547
	red nucleus	1	0.845154	2	1.34676	0	0.125988	2	1.6048	0.41984	0.0135		median raphe nucleus	3	1.93956	6	3.13636	5	2.59196	1	0.804255	0.64207	-0.03753
	interposed nucleus	7	2.60429	5	2.75487	3	3.00264	5	2.74513	0.42902	0.0078		ventromedial thalamic nucleus	10	5.24113	11	5.80442	14	4.54737	10	4.11781	0.64662	-0.03447
	extended amydala	1	0.704698	4	1.92659	1	0.854493	3	1.69031	0.4421	0.05535		primary somatosensory ctx upper lip	53	24.378	62	23.5664	61	16.3947	41	11.6222	0.6515	-0.0431
	6th cerebellar lobule	51	19.7892	18	13.2987	21	8.0802	39	16.3439	0.45612	0.05335		anterior cingulate area	44	17.1409	91	31.1007	61	23.6324	36	18.1098	0.65364	-0.0253
	ventral posteriolmedial thalamic nucleus	7	2.95775	8	4.25105	5	2.651	15	5.87975	0.4576	0.02279		infralimbic ctx	9	7.20686	25	9.50711	15	6.25579	14	6.05464	0.65439	-0.04493
	dorsal raphe	3	0.972408	1	0.683255	3	1.52102	3	1.28329	0.46636	0.02041		red nucleus	3	1.77089	3	1.44896	5	1.48938	2	1.05221	0.665	-0.0135
	primary somatosensory ctx upper lip	30	10.0044	36	21.7977	26	7.17911	55	21.7428	0.4728	0.0431		accumbens shell	16	8.51569	25	12.3255	27	10.163	13	6.80598	0.67224	-0.04406
	simple lobule cerebellum	52	20.3826	37	18.9585	31	12.7098	65	23.942	0.48602	0.07455		paramedian lobule	34	15.9806	33	16.2653	38	10.7045	49	14.3241	0.67863	-0.05011
	supraoptic nucleus	1	0.436436	1	0.404061	1	0.427247	1	0.327327	0.4867	0.05777		reticular nucleus midbrain	62	25.8741	82	26.8381	84	23.7953	58	21.1744	0.67892	-0.04887
	lateral dorsal thalamic nucleus	3	1.10657	2	1.04978	3	1.11448	4	1.45297	0.49649	0.0361		central amygdaloid nucleus	12	6.46918	15	4.75711	17	5.50144	14	4.48454	0.69001	-0.04155
	medial mammillary nucleus	7	2.17906	8	2.20331	7	2.41605	4	1.34223	0.50277	0.07305		diagonal band of Broca	1	0.704698	2	1.22786	3	1.5899	3	0.944911	0.69295	-0.06468
	lateral posterior thalamic nucleus	29	6.34603	19	6.51196	29	6.20484	30	5.84624	0.51355	0.02357		posterior thalamic nucleus	16	7.40243	36	13.9612	26	8.27431	19	8.64328	0.7061	-0.0411
	Ventricle	11	3.32686	7	2.82843	7	1.476	6	2.25022	0.51447	0.03806		paraflocculus cerebellum	62	21.3304	76	17.312	89	18.9501	73	16.9263	0.71189	-0.05653
	pineal gland	1	0.571429	1	0.597614	1	0.427247	1	0.327327	0.51968	0.02975		pineal gland	1	0.528121	2	0.636877	2	0.681385	1	0.54917	0.72047	-0.02975
	locus ceruleus	0	0.142857	0	0	0	0.125988	0	0	0.52001	0.02469		dorsal lateral striatum	68	30.3995	78	36.5602	87	25.9226	49	26.0696	0.7218	-0.02707
	raphe obscurus nucleus	1	0.714286	0	0.400892	1	0.692935	1	0.675536	0.52178	0.02823		tenia tecta ctx	11	6.41427	17	6.12768	10	4.92443	12	5.76869	0.72428	-0.06065
	vestibular nucleus	36	15.8841	18	9.28187	29	12.3708	39	14.7137	0.54673	0.01793		medial preoptic area	6	4.0051	4	3.08882	6	2.98209	9	2.84382	0.7343	-0.06804
	White Matter	39	11.3509	43	14.6684	22	8.6426	35	9.13349	0.55782	0.03306		primary somatosensory ctx barrel field	74	29.2507	95	37.1906	93	23.5213	58	19.7385	0.73496	-0.02728
	secondary somaotsensory ctx	26	10.3962	28	15.0112	18	5.92245	40	14.7779	0.59958	0.05996		lateral septal nucleus	31	15.5815	43	17.4688	47	13.9285	43	10.9038	0.7359	-0.057
	subiculum dorsal	22	5.57814	19	8.10581	14	3.72252	23	6.7797	0.60645	0.03546		6th cerebellar lobule	47	19.8691	56	19.3528	71	22.7487	61	13.9617	0.73642	-0.05335
	pontine reticular nucleus caudal	26	17.3548	19	13.7328	24	12.4438	38	17.4834	0.60691	0.01019		primary somatosensory ctx jaw	52	18.7081	71	21.44	67	13.4418	54	16.2746	0.739	-0.05048
	lateral hypothalamus	54	16.532	63	21.3651	32	7.35279	50	13.3644	0.61587	0.03695		accumbens core	16	8.04367	24	12.3582	26	9.80363	14	8.6044	0.74451	-0.03748
	inferior colliculus	84	20.5582	53	16.0044	86	21.7869	77	10.9818	0.6228	0.066		paraventricular nucleus	2	1.61414	4	1.65292	2	1.39016	2	1.26773	0.74508	-0.07561
	medial geniculate	16	3.47391	19	5.57486	13	4.90303	12	3.31124	0.62431	0.04045		raphe obscurus nucleus	1	0.737711	1	0.712498	1	0.626783	2	0.823754	0.74557	-0.02823
	reticular nucleus midbrain	42	15.4365	47	22.0264	37	12.1338	62	21.485	0.62489	0.04887		central medial thalamic nucleus	2	1.29099	3	1.20797	2	1.23924	1	0.927961	0.75083	-0.05171
	crus 1 of ansiform lobule	99	36.1985	54	31.0107	69	18.5714	83	32.6096	0.62829	0.09304		anterior thalamic nuclei	8	3.68671	17	6.67313	9	3.20404	10	3.34581	0.75207	-0.03525
	tenia tecta ctx	29	7.31553	18	7.08386	29	7.91573	26	4.92805	0.62959	0.06065		inferior olivary complex	2	1.3924	3	1.22786	2	1.00791	8	3.80215	0.7576	-0.06574
	dentate gyrus dorsal	54	15.3188	46	17.1262	29	6.89979	43	11.6113	0.64291	0.00559		claustrum	4	2.22387	7	3.3953	7	2.32225	4	1.5698	0.75855	-0.03941
	lateral septal nucleus	35	8.60904	48	19.6383	39	10.0783	58	14.3661	0.64475	0.057		3rd cerebellar lobule	26	10.3854	45	15.4232	45	13.955	33	9.3378	0.76355	-0.05228
	8th cerebellar lobule	16	9.12536	8	7.99984	12	7.06349	13	9.88887	0.64765	0.05311		secondary somaotsensory ctx	34	15.4889	44	15.6097	48	14.7503	31	10.233	0.76698	-0.05996
	copula of the pyramis	24	10.6205	20	9.4824	26	5.59372	20	7.82649	0.65155	0.08269		sub coeruleus nucleus	11	5.05144	15	6.98395	19	6.72002	11	4.5255	0.77166	-0.06183
	rostral piriform ctx	58	20.2153	58	20.9869	46	9.43293	85	22.1734	0.65331	0.02614		globus pallidus	6	3.04501	6	2.82662	8	3.3541	6	3.48523	0.77229	-0.03701
	medial amygdaloid nucleus	16	5.39841	10	3.78504	14	4.21919	16	3.70328	0.66375	0.01997		lateral amygdaloid nucleus	5	2.82	7	3.48027	7	2.83543	5	2.01778	0.77297	-0.04728
	zona incerta	14	4.80999	15	7.4284	5	1.87824	14	7.02801	0.66853	0.0236		White Matter	213	82.8941	245	87.7285	296	62.5691	221	66.5275	0.78108	-0.05081
	prerubral field	2	1.61414	2	1.3248	0	0.251976	1	0.823754	0.67203	0.04859		triangular septal nucleus	2	0.837066	2	0.998724	2	0.881917	1	0.597614	0.789	-0.06996
	crus 2 of ansiform lobule	32	15.0695	21	10.4408	36	13.995	32	16.0535	0.67449	0.09249		medial mammillary nucleus	5	2.88203	2	1.81547	2	1.26773	3	1.46385	0.7967	-0.07305
	sub coeruleus nucleus	9	4.89828	7	3.83293	7	2.48168	13	6.04973	0.6806	0.06183		primary somatosensory ctx shoulder	3	1.61835	7	3.41067	4	2.01581	2	1.15642	0.79935	-0.05314
	retrosplenial caudal ctx	67	20.7166	83	26.2484	58	17.8837	94	21.9089	0.68257	0.03793		medial septum	2	1.39728	2	0.843644	2	0.845154	3	1.40295	0.79986	-0.06565
	CA3 hippocampus ventral	19	6.31864	13	3.20992	11	4.37526	13	2.65772	0.6872	0.07091		arcuate nucleus	2	1.12788	2	1.14174	1	0.62042	1	0.901938	0.80391	-0.08271
	precuniform nucleus	2	1.15175	1	0.935414	0	0.125988	1	0.62042	0.68943	0.02713		PCRt	43	21.905	49	17.0443	59	20.4344	44	14.5219	0.80911	-0.06936
	premammillary nucleus	1	0.436436	1	0.879181	1	0.654654	2	0.681385	0.69383	0.05174		extended amydala	3	1.71627	3	1.34012	4	1.61221	3	1.46385	0.81223	-0.05535
	5th cerebellar lobule	58	23.8506	39	17.304	55	21.8166	75	27.6785	0.70075	0.07744		inferior colliculus	60	16.7829	91	18.6602	69	22.202	63	16.0295	0.81472	-0.066
	gigantocellular reticular nucleus pons	60	26.6212	31	17.7367	47	20.5409	60	24.2579	0.70338	0.07968		2nd cerebellar lobule	36	14.6262	54	19.7406	49	13.9448	37	11.6605	0.82399	-0.04936
	substantia nigra reticularis	26	6.90213	16	6.19229	19	4.66539	17	4.75094	0.7038	0.01676		8th cerebellar lobule	23	11.7685	23	11.4213	29	11.0574	28	8.29754	0.82668	-0.05311
	paraventricular nucleus	5	1.25085	4	1.62176	7	2.28956	6	2.23163	0.70907	0.07561		primary somatosensory ctx trunk	3	1.28041	5	2.24461	3	1.51317	1	0.845154	0.82761	-0.05744
	paramedian lobule	38	15.834	29	12.5731	40	12.909	31	13.6343	0.71478	0.05011		principal sensory nucleus trigeminal	28	11.9517	40	12.5027	40	11.9664	36	11.0407	0.82986	-0.073
	flocculus cerebellum	13	4.14532	10	3.90578	7	2.5	9	3.08478	0.71547	0.07068		CA3 hippocampus ventral	9	3.56189	14	4.25585	10	3.20714	12	3.94958	0.84024	-0.07091
	pedunculopontine tegmental area	1	0.986301	2	0.947607	1	1.11448	2	0.854493	0.73	0.01683		flocculus cerebellum	10	3.15474	13	3.81157	16	5.34448	10	2.24404	0.84111	-0.07068
	periolivary nucleus	9	5.25538	12	4.31774	7	2.6057	10	4.16524	0.73057	0.07871		ventral medial striatum	21	9.26811	30	14.877	28	10.0214	23	9.57199	0.85459	-0.0499
	cochlear nucleus	17	5.7131	13	4.11784	11	4.64066	11	3.90055	0.74354	0.03233		olfactory tubercles	23	6.17213	36	13.1132	32	5.53918	30	11.1896	0.85946	-0.06802
	dorsomedial tegmental area	4	2.52336	3	1.79498	6	2.8473	8	3.63896	0.7466	0.05918		solitary tract nucleus	13	5.46168	18	5.92728	13	4.84031	13	4.98927	0.88203	-0.07378
	solitary tract nucleus	11	5.94361	4	2.00954	10	6.18883	12	5.69774	0.80467	0.07378		9th cerebellar lobule	25	12.2216	18	11.0295	26	10.2756	29	8.02699	0.88986	-0.07613
	caudal piriform ctx	69	15.9921	65	13.211	78	11.3957	85	17.1443	0.81361	0.06844		5th cerebellar lobule	63	19.9974	81	27.7386	91	27.1469	69	19.4615	0.89607	-0.07744
	ventral medial nucleus	9	2.96808	10	2.62202	7	2.71094	8	2.02759	0.83262	0.03846		supramammillary nucleus	2	1.1547	2	1.29363	3	1.11981	3	1.0709	0.89631	-0.07238
	paraventricular nuclus	2	0.865043	2	1.06905	1	0.580777	2	0.92582	0.8463	0.0547		lateral preoptic area	5	2.70676	4	2.8026	5	2.47447	5	1.78286	0.89758	-0.06837
	subthalamic nucleus	0	0.142857	0	0.174964	0	0.125988	0	0.125988	0.84686	0.07303		simple lobule cerebellum	48	17.0334	63	22.3723	65	15.7171	53	16.979	0.89761	-0.07455
	medial preoptic area	8	2.91839	11	4.11071	11	3.72625	11	3.52598	0.84899	0.06804		periolivary nucleus	10	4.37759	8	2.68737	14	4.98131	9	3.85964	0.90653	-0.07871
	magnocellular preoptic nucleus	2	0.961858	2	0.843644	2	0.811622	3	0.886405	0.85921	0.09247		gigantocellular reticular nucleus pons	55	28.9925	52	22.6452	63	20.137	55	16.7216	0.90658	-0.07968
	lateral geniculate	16	4.69404	14	5.13889	13	6.28616	11	2.97876	0.87081	0.03305		pontine reticular nucleus oral	13	5.36745	24	10.8542	17	8.76569	15	9.49812	0.91464	-0.07124
	paraflocculus cerebellum	92	28.0891	67	20.2776	59	13.0034	68	18.3254	0.88349	0.05653		copula of the pyramis	24	10.3128	22	9.77489	20	6.96932	26	7.41406	0.93447	-0.08269
	facial nucleus	12	4.67516	14	4.32836	9	2.85635	11	3.59066	0.9012	0.03735		ventral posteriolateral thalamic nucleus	14	6.20566	17	8.36111	16	4.21731	12	5.77488	0.93502	-0.07688
	PCRt	48	20.4029	44	12.9957	39	14.3827	48	18.3293	0.90994	0.06936		4th cerebellar lobule	35	14.1647	46	19.3316	44	15.2051	37	10.6938	0.94367	-0.07837
	trapezoid body	5	2.2116	5	2.31014	4	2.00891	6	2.46	0.91195	0.08233		interpeduncular nucleus	6	3.97869	4	2.27677	3	1.2215	5	2.11382	0.94522	-0.09154
	9th cerebellar lobule	21	10.6946	12	8.71999	11	6	18	8.79416	0.91667	0.07613		bed nucleus stria terminalis	9	5.01901	14	6.76557	13	6.71737	9	4.76012	0.9544	-0.07363
	root of trigeminal nerve	49	11.8169	36	8.37498	36	9.14565	42	9.86597	0.93273	0.02967		magnocellular preoptic nucleus	2	0.719032	2	0.989743	2	0.718243	2	1.07644	0.96048	-0.09247
	arcuate nucleus	3	1.29887	3	1.25255	3	1.30931	4	1.32288	0.93471	0.08271		primary somatosensory ctx hindlimb	19	6.40631	27	13.2549	21	8.27647	13	3.84986	0.9767	-0.07105
	medial septum	2	0.611678	2	1.10195	1	0.734631	2	0.766356	0.94643	0.06565		ventrolateral thalamic nucleus	11	4.45003	12	5.27388	11	3.71024	9	2.61179	0.97947	-0.07678
	diagonal band of Broca	7	1.75158	7	2.44897	8	2.26341	7	1.93752	0.95031	0.06468		reticular nucleus	10	5.39589	13	6.51666	9	3.37239	10	4.25012	0.98617	-0.08698
	principal sensory nucleus trigeminal	37	14.7998	31	8.31138	38	11.9455	37	11.4395	0.9835	0.073		ventral anterior thalamic nucleus	4	1.79758	4	1.94766	4	1.84197	4	1.80717	0.98735	-0.07301
	raphe magnus	5	2.2872	4	1.95615	3	1.49337	4	1.85164	0.98583	0.0439		crus 2 of ansiform lobule	35	14.797	34	16.0604	35	10.6023	40	14.1888	0.99031	-0.09249
	anterior hypothalamic area	9	3.94262	10	4.465	9	3.51414	10	2.952	0.9873	0.05434		crus 1 of ansiform lobule	85	27.7032	100	37.1813	90	27.4135	107	33.4611	0.99654	-0.09304
